# Supplementary material for: The Large Subunit rDNA Sequence of Plasmodiophora brassicae Does not Contain Intra-species Polymorphism
Source: PubMed Central journal article supplement — Protist. Author manuscript; Available in PMC 2017 Jan 9. (PMC5221739; doi:10.1016/j.protis.2016.08.008), 2016-09-09
Supplement: NIHMS70675-supplement-Supplement.pdf [file NIHMS70675-supplement-Supplement.pdf]

## Supplementary Information

### **The large subunit rDNA sequence of *Plasmodiophora brassicae* does not contain intra-species polymorphism.**

Arne Schwelm, Cédric Berney, Christina Dixelius, David Bass, Sigrid Neuhauser

Contents:

Supplementary Fig. S1: Schematic representation of the ribosomal cluster of *Plasmodiophora brassicae*

Supplementary Fig. S2: Diagrammatic representation of the LSU regions analyses.

Supplementary Fig. S3: Bayesian tree with distances from Fig. 1A.

Supplementary Fig. S4: Bayesian tree containing distances from Fig. 1B.

Supplementary Tab. S1: Primers used for generating full length LSU sequences.

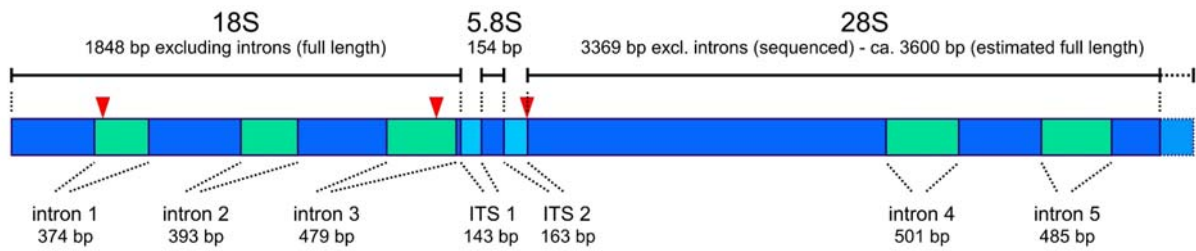

**Supplementary Fig. S1:** Schematic representation of the ribosomal cluster of *Plasmodiophora brassicae*, showing the position and respective length of the three coding regions (18S, 5.8S and 28S), the two internal transcribed spacers (ITS1 & ITS2), and the five introns. The fragment amplified and sequenced from isolate AT is represented (GenBank accession number KX011115); it is 7909 bp long and all regions are drawn to scale. The missing part at the 3' end of 28S (indicated with a dotted line) is expected to be ca. 230 bp long. Red arrows indicate the position of the only three differences we observed between the sequence of isolate AT and the genomic contig from isolate e3 (see the Results section for details).

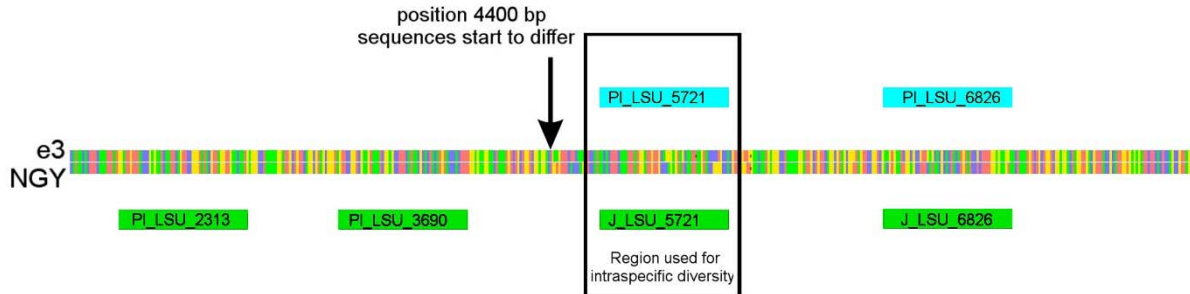

**Supplementary Fig. S2:** Diagrammatic representation of the LSU gene (not to scale) showing the distribution of the probes along the LSU gene. Arrow marks the point where the two sequences start to differ, a box highlights the region used for intraspecific diversity analyses (see Fig. 2).

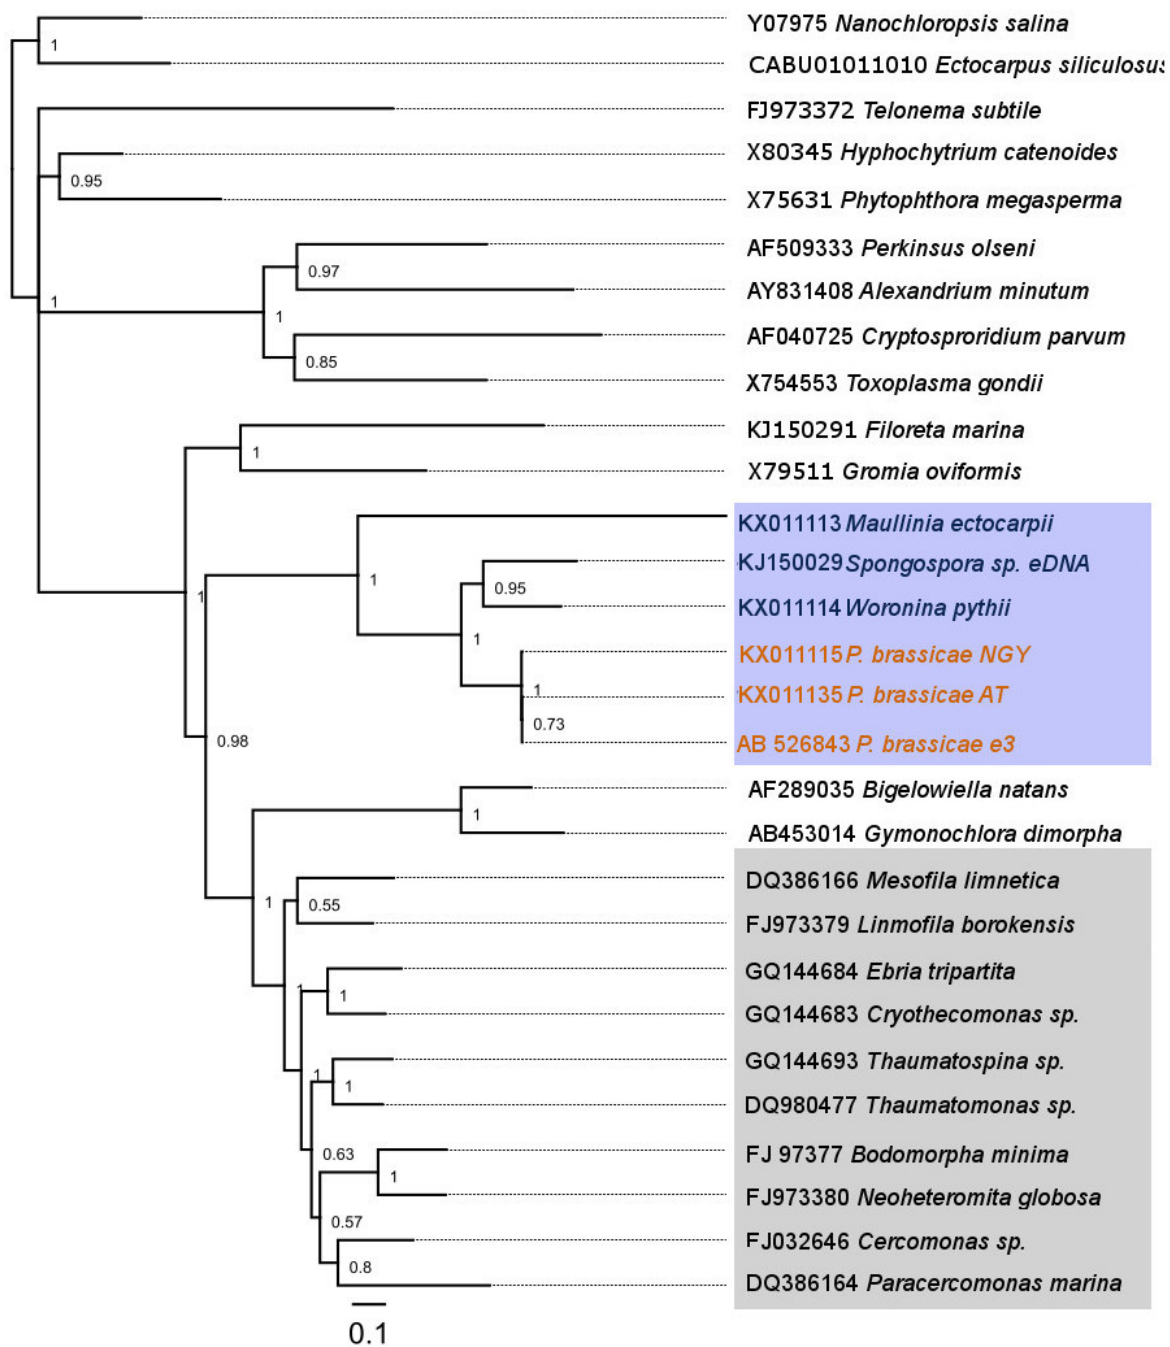

**Supplementary Fig. S3:** Bayesian tree with distances belonging to Fig. 1A with posterior probabilities. Only the 5' of the LSU gene was used to generate this tree. All *P. brassicae* sequences form one, consistent and well supported clade together with the other phytomyxid sequences. Dotted lines are for visual support only.

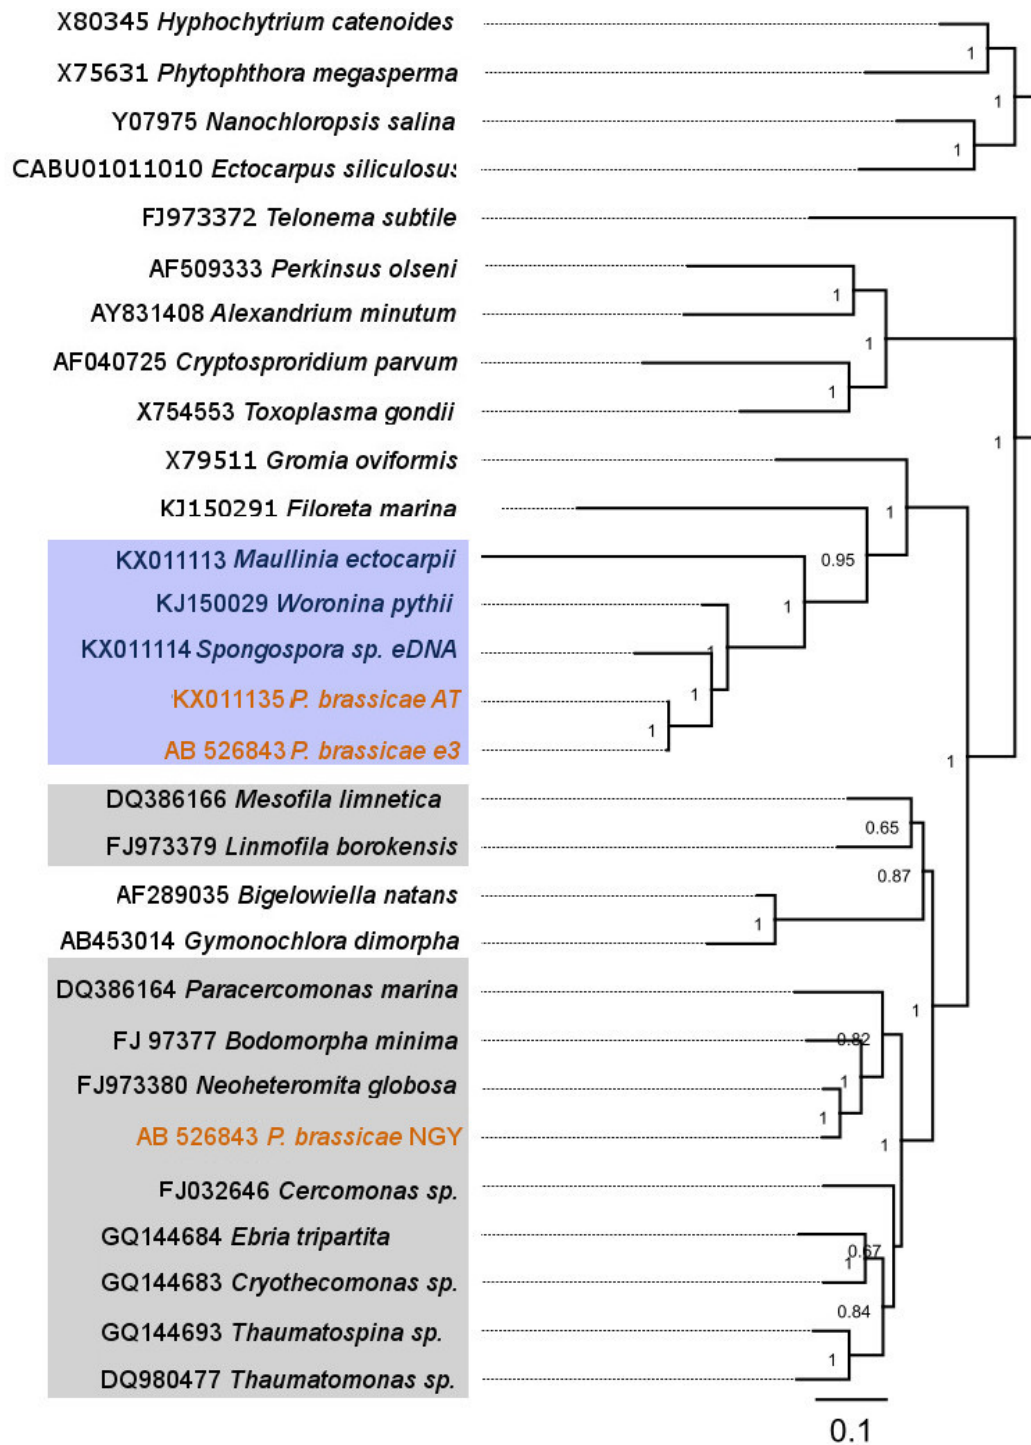

**Supplementary Fig. S4:** Bayesian tree with distances belonging to Fig. 1B with posterior probabilities. Only the 3' of the LSU gene was used to generate this tree. *P. brassicae* sequences generated in this study form one, consistent and well supported clade together with the other phytoomyxid sequences. The sequence *P. brassicae* NGY, however, groups within Cercozoa with high support values and is very similar to the *Neoheteromitha globosa* sequence. Dotted lines are for visual support only.

**Supplementary Table S1.** Description of the PCR primers used in this study.

| name      | sequence                        | orientation | specificity                          | position * |
|-----------|---------------------------------|-------------|--------------------------------------|------------|
| sA1n      | 5'-TACCTGGTTGATCCTGCCAGT-3'     | forward     | universal (eukaryotes)               | 1-21       |
| sA6-phy   | 5'-GATGGCTCATTAAHAWCAGTYTGAA-3' | forward     | Phytomyxea                           | 93-116     |
| V7f-Phag  | 5'-GACCTCAGCYTRYTGTTGTT-3'      | forward     | Phagomyxida                          | 2133-2153  |
| V7f-Plas  | 5'-GACCTCAGCCTGCTTTTGTAG-3'     | forward     | Plasmodiophorida                     | 2133-2153  |
| C9f-Phag  | 5'-CTTGAAAYTMGCCGACCAAC-3'      | forward     | Phagomyxida                          | 2367-2387  |
| C9f-Plas  | 5'-CTTGSAAAYTAGAGGCACCAAC-3'    | forward     | Plasmodiophorida                     | 2367-2387  |
| C9r-Phyt  | 5'-GGAATTCCTCGTTGGTGCGBSBART-3' | forward     | most Phytomyxea                      | 2373-2397  |
| V9r-Mau   | 5'-GTCAAGATTCAGAATAGTTCATC-3'   | forward     | <i>Maulinia</i>                      | 2532-2554  |
| sB2phy    | 5'-CCTTGTTACGACTTCTYCTCYTC-3'   | reverse     | Phytomyxea and many other eukaryotes | 2560-2583  |
| sB1n      | 5'-GATCCHTCYGCAGGTTACCTACG-3'   | reverse     | universal (eukaryotes)               | 3067-3090  |
| D14f-phy1 | 5'-GATTAGAGGCSTTTGGSGCAA-3'     | forward     | Phytomyxea                           | 4744-4764  |
| D14f-phy2 | 5'-GCAAAATGCWCYGAACCTATTCTC-3'  | forward     | Phytomyxea                           | 4761-4784  |
| 21R       | 5'-GACGAGGCATTTGGCTACCTT-3'     | reverse     | universal (eukaryotes)               | 6529-6549  |
| 22R       | 5'-CCATTCATGCRCGTCACWART-3'     | reverse     | universal (eukaryotes)               | 6555-6575  |
| nH2r      | 5'-GAHHBARCKGTTCTCTCGTACT-3'    | reverse     | universal (eukaryotes)               | 7796-7818  |
| nH4r      | 5'-GGNTTCBRDYTTAGAGGCGTTCA-3'   | reverse     | universal (eukaryotes)               | 7886-7908  |

\* based on the sequence of *Plasmodiophora brassicae* isolate AT, GenBank accession number KX011115.
